# Supplementary material for: A novel zirconium-based metal–organic framework covalently modified by methyl pyridinium bromide for mild and co-catalyst free conversion of CO2 to cyclic carbonates
Source: Royal Society of Chemistry journal article supplement (doi:10.1039/d2dt03507c), 2022-12-12
Supplement: d2dt03507c1.pdf [file d2dt03507c1.pdf]

Electronic Supplementary Material (ESI) for *Dalton Transactions*

This journal is © The Royal Society of Chemistry and the Centre National de la Recherche Scientifique 2022

**A novel zirconium-based metal-organic framework covalently  
modified by methyl pyridinium bromide for mild and co-catalyst free  
conversion of CO<sub>2</sub> to cyclic carbonates**

Jia-Hui Xu<sup>‡,a</sup>, Shuai-Feng Peng<sup>‡,a</sup>, Yukun Shi,<sup>a</sup> Shan Ding,<sup>a</sup> Guang-Sheng Yang,<sup>\*a</sup> Yu-Qi Yang,<sup>a</sup>  
Yan-Hong Xu,<sup>\*b</sup> Chunjie Jiang<sup>\*a</sup> and Zhong-Min Su<sup>c</sup>

<sup>a</sup> School of Chemistry and Chemical Engineering, Liaoning Normal University, Dalian 116029, P. R. China. Email: yanggs693@nenu.edu.cn, jiangcj@lnnu.edu.cn.

<sup>b</sup> Key Laboratory of Preparation and Applications of Environmental Friendly Materials, Key Laboratory of Functional Materials Physics and Chemistry of the Ministry of Education (Jilin Normal University), Ministry of Education, Changchun, 130103. xuyh198@163.com.

<sup>c</sup> State Key Laboratory of Supramolecular Structure and Materials, Institute of Theoretical Chemistry, College of Chemistry, Jilin University, Changchun 130021, P. R. China.

<sup>‡</sup> Electronic Supplementary Information (ESI) available. See DOI: 10.1039/b000000x/

<sup>‡</sup> These authors contributed equally to this work.

## Table of contents

|                                                                                                                                          |    |
|------------------------------------------------------------------------------------------------------------------------------------------|----|
| I. Experimental section.....                                                                                                             | S3 |
| Synthesis of H <sub>2</sub> MPTDC.....                                                                                                   | S3 |
| II. Supplementary illustrations and explanations.....                                                                                    | S4 |
| Fig. S1 The FT-IR spectrum of intermediate I2. ....                                                                                      | S4 |
| Fig. S2 The FT-IR spectra of ligand H <sub>2</sub> MPTDC. ....                                                                           | S4 |
| Fig. S3 <sup>1</sup> H NMR spectra of Intermediate I2.....                                                                               | S5 |
| Fig. S4 <sup>13</sup> C NMR spectra of Intermediate I2.....                                                                              | S5 |
| Fig. S5 <sup>1</sup> H NMR spectra of ligand H <sub>2</sub> MPTDC. ....                                                                  | S6 |
| Fig. S6 <sup>13</sup> C NMR spectra of ligand H <sub>2</sub> MPTDC.....                                                                  | S6 |
| Fig. S7 The XPS of (Br <sup>-</sup> )CH <sub>3</sub> -Pyridinium-MOF-1. ....                                                             | S7 |
| Fig. S8 <sup>1</sup> H NMR spectra of (Br <sup>-</sup> )CH <sub>3</sub> -Pyridinium-MOF-1. ....                                          | S7 |
| Fig. S9 (a) SEM image of (Br <sup>-</sup> )CH <sub>3</sub> -Pyridinium-MOF-1 and (b) analysis of particle size distribution in SEM. .... | S8 |
| Fig. S10 N <sub>2</sub> Adsorption isotherms of Pyridyl-MOF-1 and (Br <sup>-</sup> )CH <sub>3</sub> -Pyridinium-MOF-1. ....              | S8 |
| Fig. S11 Recycled Experiments of (Br <sup>-</sup> )CH <sub>3</sub> -Pyridinium-MOF-1. ....                                               | S9 |
| III. Supplementary References .....                                                                                                      | S9 |

## I. Experimental section

### Synthesis of H<sub>2</sub>MPTDC

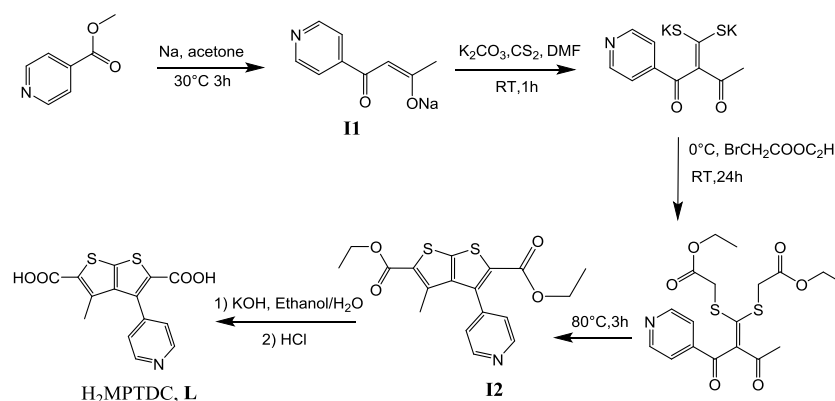

**Scheme S1** The synthetic route of H<sub>2</sub>MPTDC.

The ligand H<sub>2</sub>MPTDC was synthesized according to a similar route from the reference with appropriate modifications.<sup>S1-S4</sup>

**Synthesis of MPTDC-C<sub>2</sub>H<sub>5</sub>.** The mixture of 13.2 mL methyl isonicotinate (15.00 g, 0.11 mol), 9.50 mL acetone (7.50 g, 0.13 mmol) and 50 mL anhydrous ether was added into a 100mL three-necked flask and then cooling to 0~2 °C, under the protection of nitrogen, 2.50 g (0.11 mol) of newly cut metal sodium tablets were added in batches with continuous stirring at room temperature for 3h. The reaction mixture was filtered by suction, the filter cake was washed with a small amount of ethyl acetate, and the obtained solid was dried in vacuum to obtain powdery yellow solid 1-(pyridin-4-yl)-1,3-butanedione sodium salt I1. Subsequently, intermediate 1 (1.85 g, 10 mmol), K<sub>2</sub>CO<sub>3</sub> (8.28 g, 60 mmol) in 10 mL DMF were well mixed at ice bath in a 100 mL three-necked flask. Controlled the temperature of mixture at 0~5 °C, and slowly added 0.6mL CS<sub>2</sub> (0.76 g, 10 mmol), and stirred for 1 h at 20 °C. Under the condition of ice bath, ethyl bromoacetate (2.22 mL, 20 mmol) and 10 mL DMF were added dropwise, stirred at room temperature for 24 hours, and then heated to 80 °C for 3h. The reaction solution was poured into ice deionized water, then the solid was precipitated. The reaction mixture was filtered by suction, and purified by column chromatography with ethyl acetate/petroleum ether (1/3), and the light yellow solid powder 3-methyl-4-pyridin-4-yl-thieno [2,3-b] thiophene-2,5-di carboxylic acid diethyl ester (MPTDC-C<sub>2</sub>H<sub>5</sub>) (I2) was obtained with a yield of 30%. FT-IR (KBr, cm<sup>-1</sup>): 2981 (m), 1718 (vs), 1598 (m), 1483 (s), 1419 (m), 1373 (m), 1294 (vs), 1224 (s), 1166 (s), 1091 (s), 1024 (s), 846 (m), 763 (w), 626 (w) (Fig. S1). <sup>1</sup>H NMR (500 MHz, CDCl<sub>3</sub>) δ 8.73 (d, J = 6.0 Hz, Ar(14,16)-H, 2H), 7.38 (d, J = 5.4 Hz, Ar(13,17)-H, 2H), 4.35 (d, J = 7.1 Hz, C21-H, 2H), 4.18 (d, J = 7.1 Hz, C24-H, 2H), 2.13 (s, C10-H, 3H), 1.37 (t, J = 7.1 Hz, C22-H, 3H), 1.15 (t, J = 7.1 Hz, C25-H, 3H) (Fig. S3). <sup>13</sup>C NMR (126 MHz, CDCl<sub>3</sub>) δ 162.19(C12), 161.25(C9), 149.30(C14,16), 145.86(C8), 145.13(C11), 143.70(C1), 140.00(C5), 139.12(C4), 132.71(C2), 131.00(C7), 124.26(C13,17), 61.48(C21), 61.25(C24), 14.29(C22), 14.17(C25), 13.82(C10) (Fig. S4).

**Synthesis of H<sub>2</sub>MPTDC.** MPTDC-C<sub>2</sub>H<sub>5</sub> (1 g) and KOH (1 g) were added into mixed solution of 10 mL deionized water and 10 mL ethanol in a 100 mL flask, then heated and refluxed for 3 h, after slowly cooling to ambient temperature and adjusted the pH value to 2 with 2M HCl, a large amount of pale yellow solid separated, then filtered and washed it to neutrality. The light yellow solid of H<sub>2</sub>MPTDC was obtained with 95% yield. FT-IR (KBr, cm<sup>-1</sup>): 1689 (m), 1623 (s), 1496 (s), 1352 (s), 1244 (vs), 880 (m), 835 (m), 756 (s), 632 (w) (Fig. S2). <sup>1</sup>H NMR (500 MHz, DMSO-d<sub>6</sub>) δ 13.25 (s, O(17,20)-H, 2H), 8.64 (d, J = 6.1 Hz, Ar(12,14)-H, 2H), 7.44 (d, J = 6.0 Hz, Ar(11,15)-H, 2H), 2.01 (s, C9, 3H) (Fig. S5). <sup>13</sup>C NMR (126 MHz, DMSO-d<sub>6</sub>) δ 163.86(C19), 162.72(C16), 149.14(C12,14), 145.77(C8), 144.43(C10), 144.01(C1), 138.99(C4), 138.88(C5), 134.05(C2), 132.17(C7), 125.13(C11,C15), 14.05(C9) (Fig. S6).

## II. Supplementary illustrations and explanations

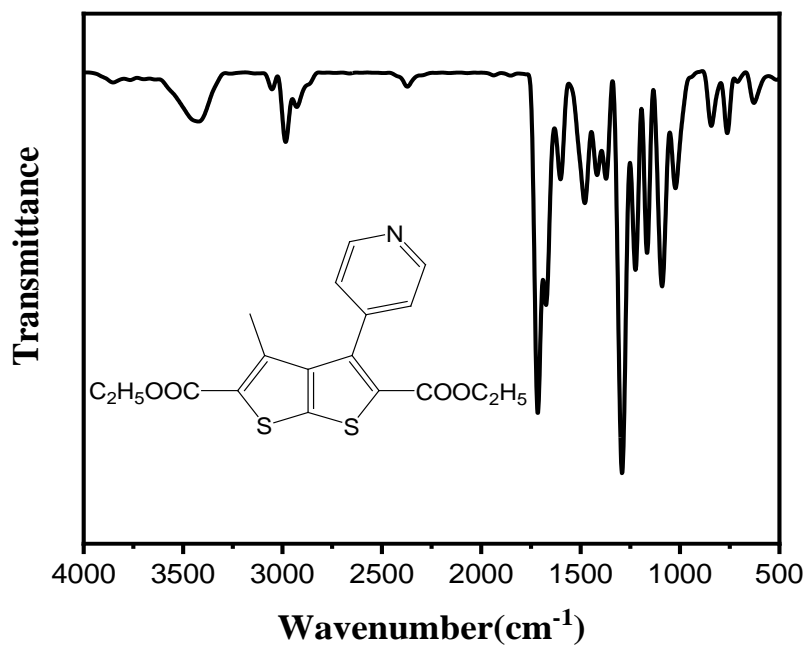

Fig. S1 The FT-IR spectrum of intermediate I2.

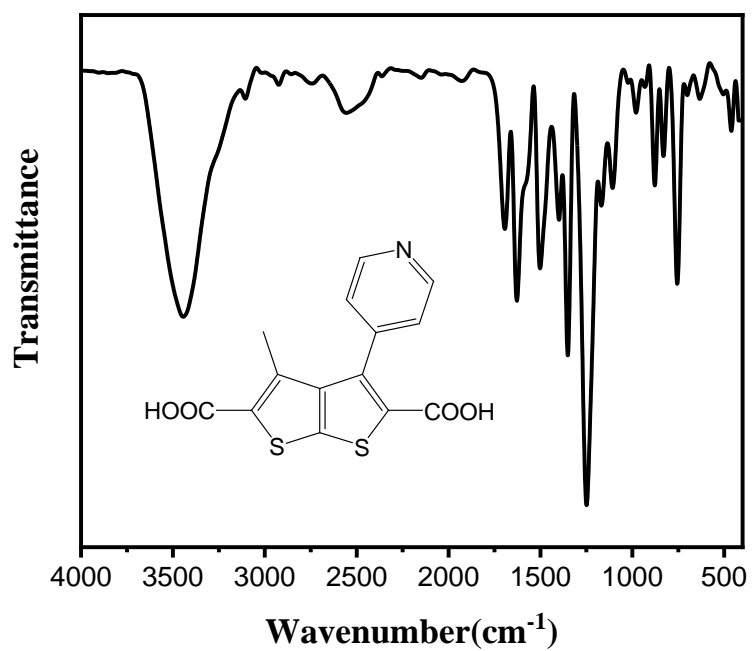

Fig. S2 The FT-IR spectra of ligand H<sub>2</sub>MPTDC.

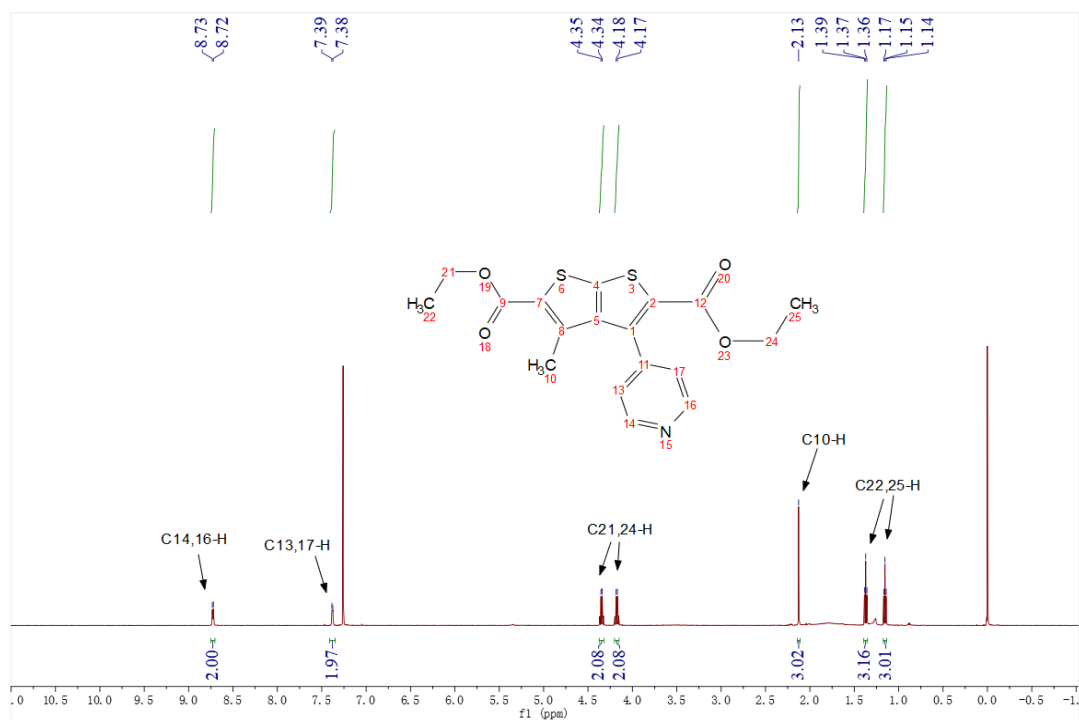

Fig. S3  $^1\text{H}$  NMR spectra of Intermediate I2.

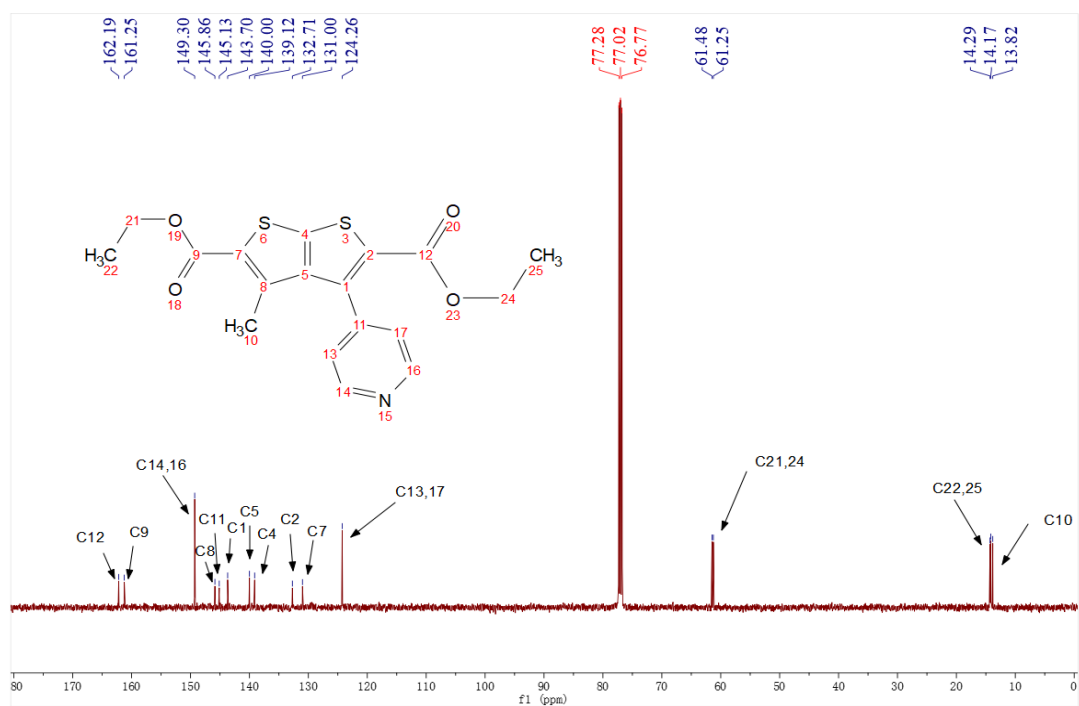

Fig. S4  $^{13}\text{C}$  NMR spectra of Intermediate I2.

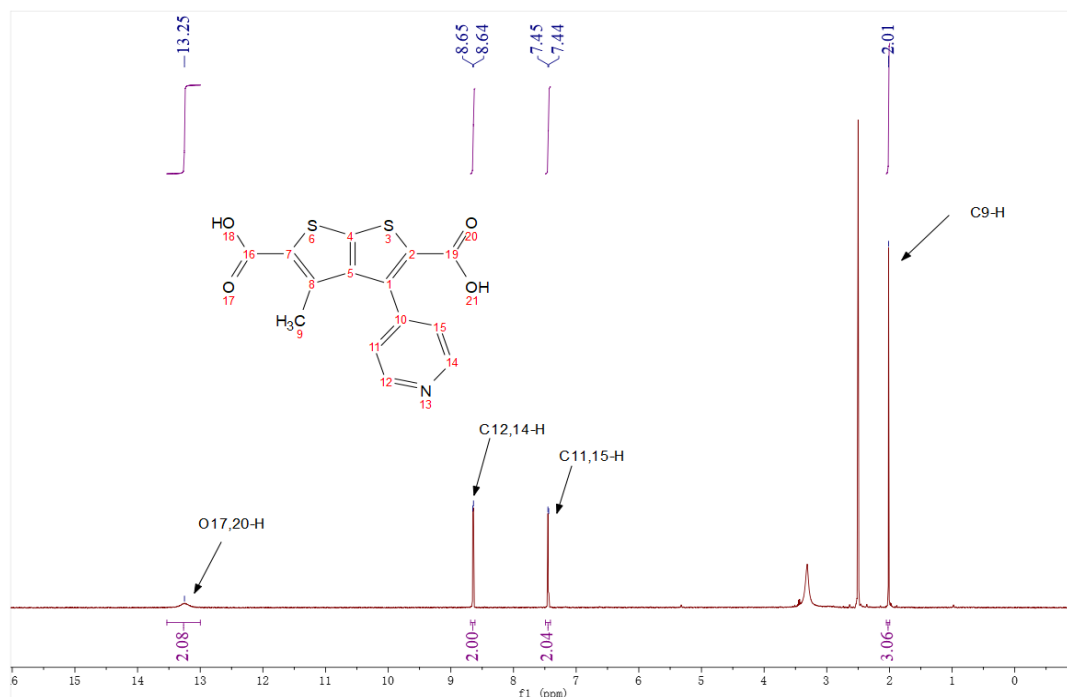

Fig. S5  $^1H$  NMR spectra of ligand  $H_2MPTDC$ .

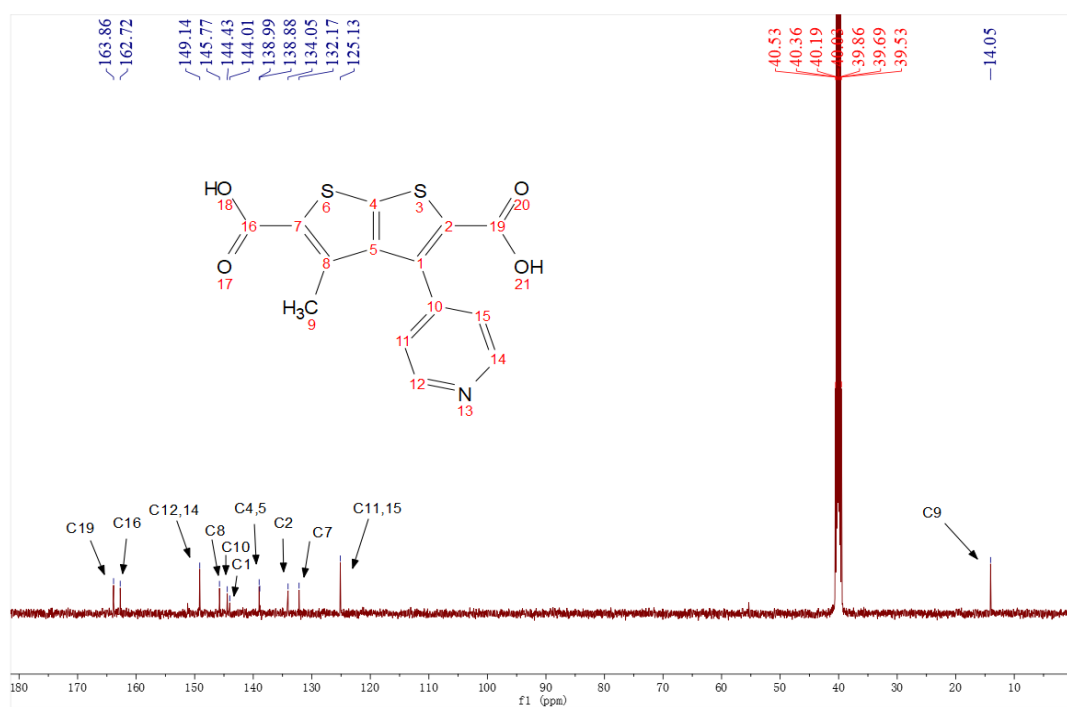

Fig. S6  $^{13}C$  NMR spectra of ligand  $H_2MPTDC$ .

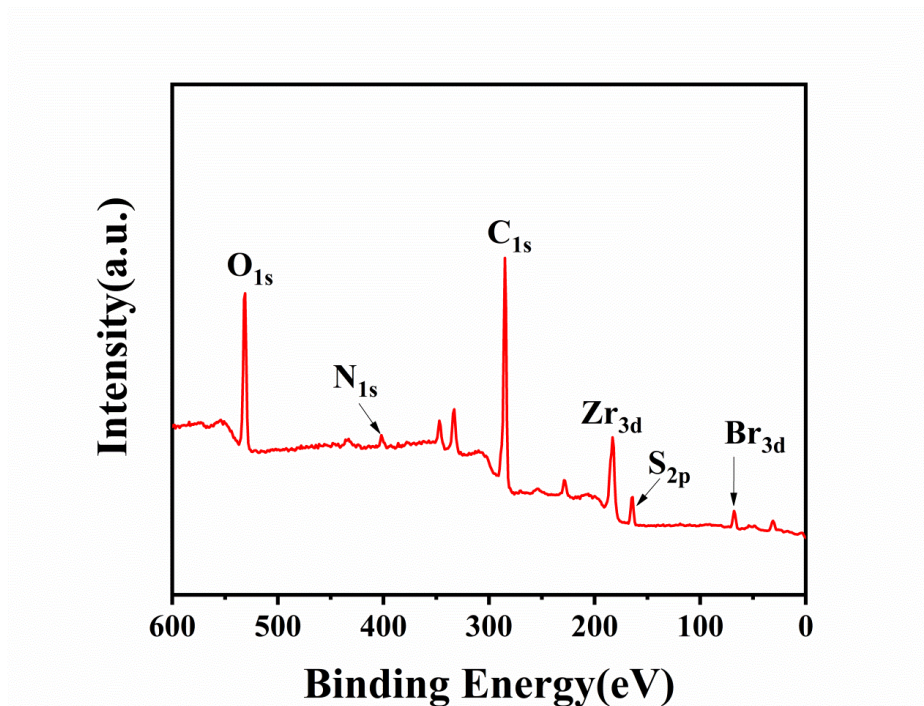

Fig. S7 The XPS of  $(\text{Br}^-)\text{CH}_3\text{-Pyridinium-MOF-1}$ .

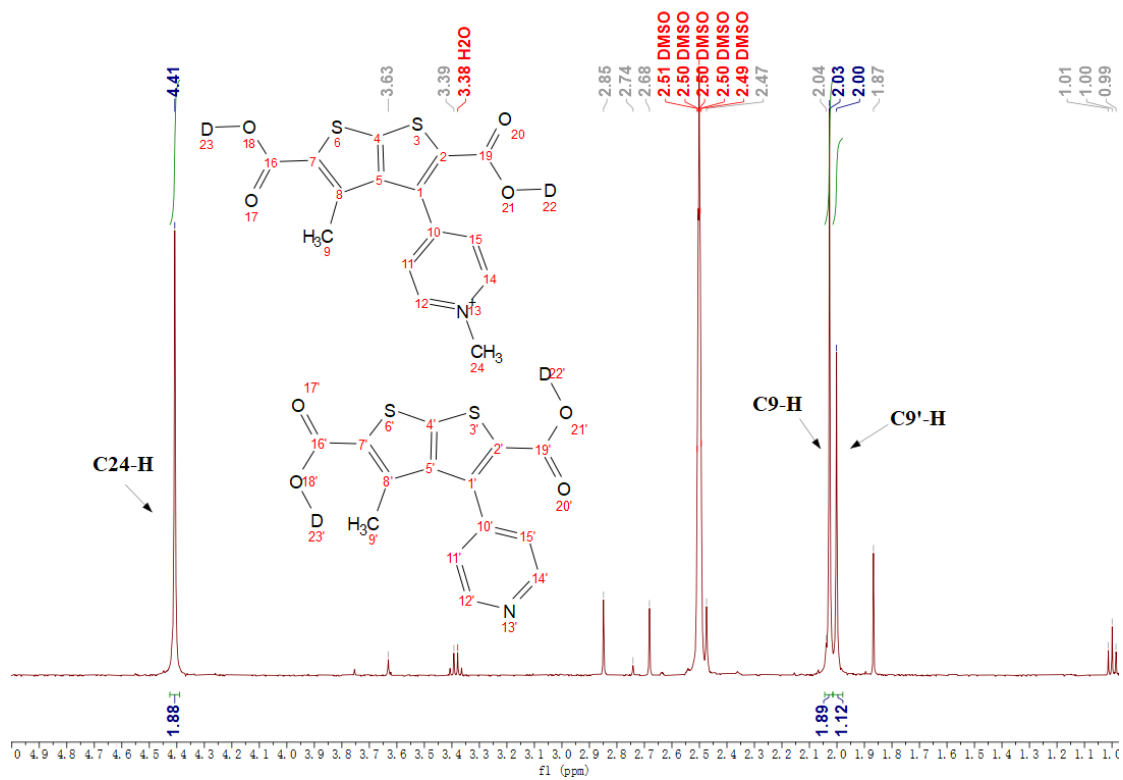

Fig. S8  $^1\text{H}$  NMR spectra of  $(\text{Br}^-)\text{CH}_3\text{-Pyridinium-MOF-1}$ .

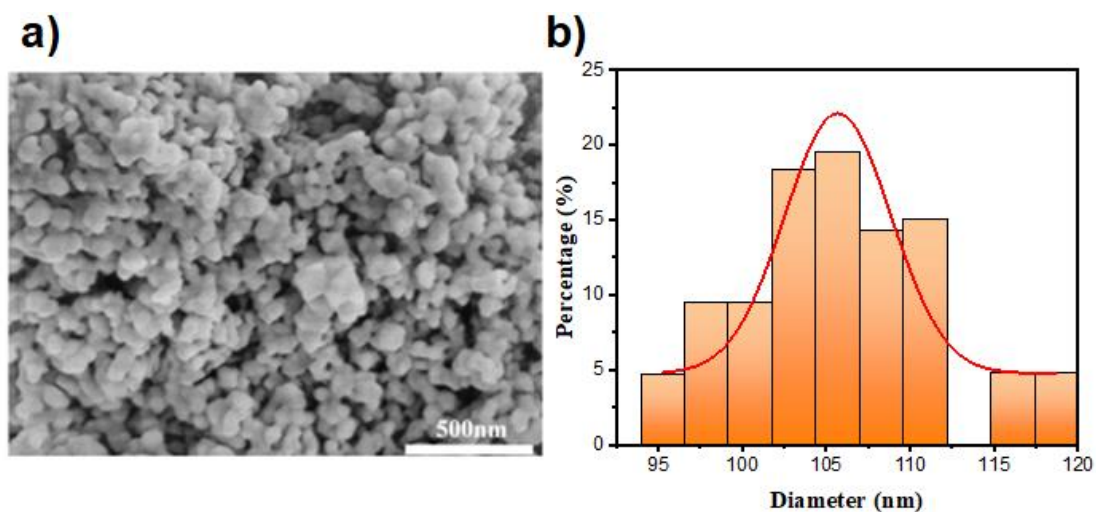

Fig. S9 (a) SEM image of  $(\text{Br}^-)\text{CH}_3\text{-Pyridinium-MOF-1}$  and (b) analysis of particle size distribution in SEM.

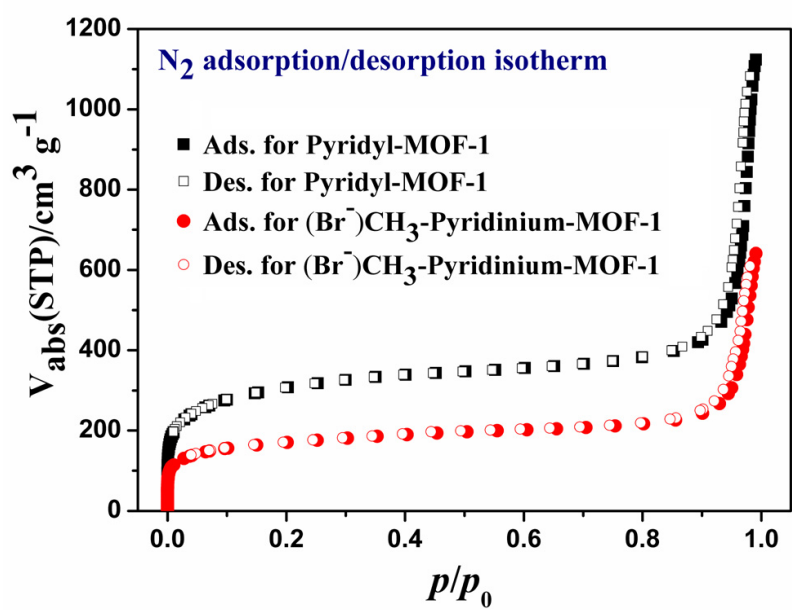

Fig. S10  $\text{N}_2$  Adsorption isotherms of Pyridyl-MOF-1 and  $(\text{Br}^-)\text{CH}_3\text{-Pyridinium-MOF-1}$ .



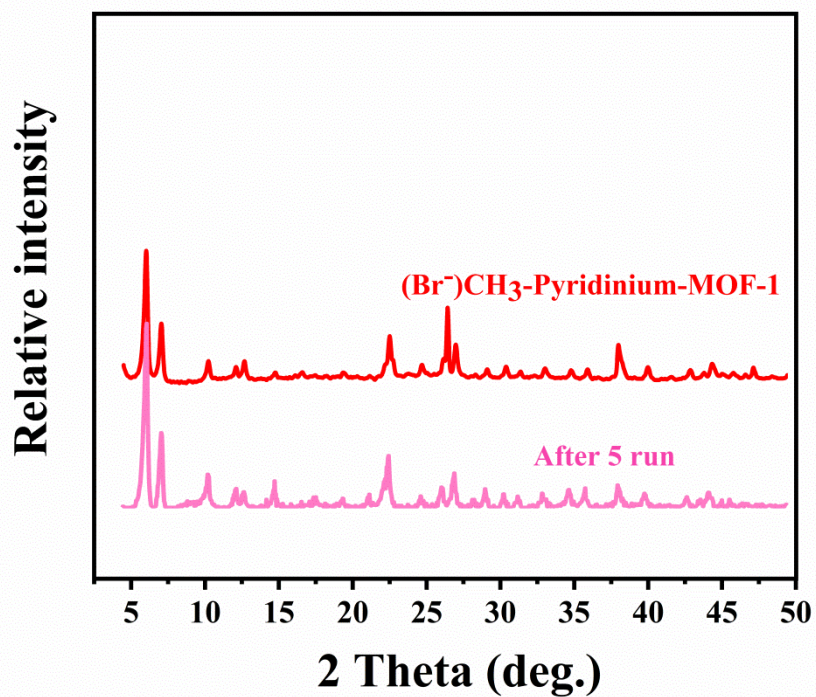

Fig. S11 Recycled experiments of (Br<sup>-</sup>)CH<sub>3</sub>-Pyridinium-MOF-1.

### III. Supplementary References

- S1 M. Andres, M. Bravo, M. A. Buil, M. Calbet, M. Castillo, J. Castro, P. Eichhorn, M. Ferrer, M. D. Lehner, I. Moreno, R. S. Roberts and S. Sevilla, *Eur. J. Med. Chem.*, 2014, **71**, 168-184.
- S2 A. Cornel and G. Kirsch, *J. Heterocycl. Chem.*, 2001, **38**, 1167-1171.
- S3 M. Sk, M. Grzywa, D. Volkmer and S. Biswas, *J. Solid State Chem.*, 2015, **232**, 221-227.
- S4. Ding, C. Cheng, J.-H. Xu, Z. Tang, G.-S. Yang, S.-F. Peng, L.-Q. Yu, C.-J. Jiang and Z.-M. Su, *New J. Chem.*, 2022, **46**, 18710-18717.
